# Supplementary material
Source: PubMed Central journal article supplement (PMC1462983)
Supplement: 7601096s1.pdf [file 7601096s1.pdf]

**Supplementary Table SI.** Data collection and phasing statistics of the Ecl18kI-DNA selenomethionine variant and bromide soak.

| Data set                      | Selenomethionine                              |             | Potassium bromide soak                        |                     |             |             |
|-------------------------------|-----------------------------------------------|-------------|-----------------------------------------------|---------------------|-------------|-------------|
| Space group                   | P2 <sub>1</sub> 2 <sub>1</sub> 2 <sub>1</sub> |             | P2 <sub>1</sub> 2 <sub>1</sub> 2 <sub>1</sub> |                     |             |             |
| a (Å)                         | 78.25                                         |             | 78.71                                         |                     |             |             |
| b (Å)                         | 96.62                                         |             | 96.56                                         |                     |             |             |
| c (Å)                         | 192.28                                        |             | 192.69                                        |                     |             |             |
| Wavelength                    | 0.9792                                        | 0.9795      | 0.9000                                        | 0.9185              | 0.9200      | 1.0500      |
| Total reflections             | 321 874                                       | 323 398     | 386 433                                       | 388 657             | 390 086     | 384 793     |
| Unique reflections            | 42 112                                        | 42 232      | 158 858                                       | 159 381             | 159 548     | 158 113     |
| Resolution range (Å)          | 20.0 – 3.3                                    | 20.0 – 3.3  | 20.0 – 2.1                                    | 20.0 – 2.1          | 20.0 – 2.1  | 20.0 – 2.1  |
| Completeness (%) (last shell) | 99.8 (100)                                    | 99.9 (100)  | 95.9 (92.1)                                   | 96.4 (93.5)         | 96.3 (93.4) | 95.3 (90.0) |
| I/σ (last shell)              | 28.9 (13.3)                                   | 27.4 (11.7) | 16.3 (1.9)                                    | 16.2 (2.0)          | 18.6 (2.6)  | 19.9 (2.9)  |
| R(sym) (%) (last shell)       | 7.6 (16.0)                                    | 7.9 (18.0)  | 5.1 (47.2)                                    | 5.2 (45.3)          | 4.3 (35.7)  | 4.0 (34.5)  |
| FOM after MLPHARE             | 0.58 (20.0 – 3.5 Å)                           |             |                                               | 0.35 (20.0 – 2.3 Å) |             |             |
| FOM after SIGMAA              | 0.39 (20.0 – 2.3 Å)                           |             |                                               |                     |             |             |
